# Supplementary material
Source: publisher figshare collection journal article supplement (https://acs.figshare.com/ndownloader/files/17922572)
Supplement: Supplementary file 1 [file 17922572]

# Thermal Responsive Photonic Crystal with Function of Color Switch Based on Thermochromic System

*Fangfang Liu<sup>1</sup>, Shufen Zhang<sup>1</sup>, Xin Jin<sup>2</sup>, Wentao Wang<sup>3</sup> and Bingtao Tang<sup>1,2\*</sup>*

1 State Key Laboratory of Fine Chemicals, Dalian University of Technology, Dalian 116024, China

2 Eco-chemical Engineering Cooperative Innovation Center of Shandong, Qingdao University of Science and Technology, Qingdao 266042, China

3 Key Laboratory of Advanced Textile Materials and Manufacturing Technology, Ministry of Education, Zhejiang Sci-Tech University, Hangzhou 310018, China

E-mail: [tangbt@dlut.edu.cn](mailto:tangbt@dlut.edu.cn)

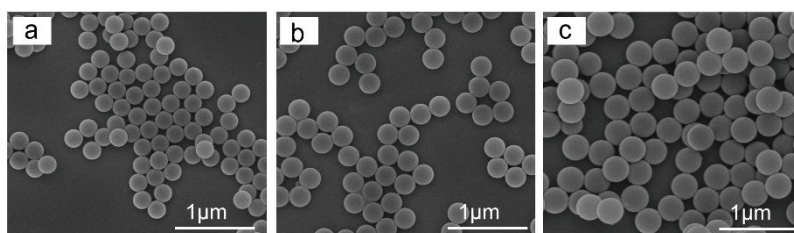

Figure S1. SEM images of PS spheres (a) 251 nm, (b) 305nm, (c) 368nm

Table S1. Size measurement of three kinds of PS emulsion

| Sample | Amount of<br>emulsifier<br>(mg) | Size (nm)      |                | PDI   | Zeta<br>potential<br>(mV) |
|--------|---------------------------------|----------------|----------------|-------|---------------------------|
|        |                                 | D <sub>a</sub> | D <sub>h</sub> |       |                           |
| Blue   | 75.1                            | 251            | 276            | 0.041 | -28.2                     |
| Green  | 45.7                            | 305            | 328            | 0.005 | -31.3                     |
| Red    | 16.2                            | 368            | 420            | 0.027 | -30.6                     |

\*D<sub>h</sub>: Hydrodynamic size of these microspheres measured by Nanoparticle size measurement, D<sub>a</sub>: Actual measured diameters from the SEM.

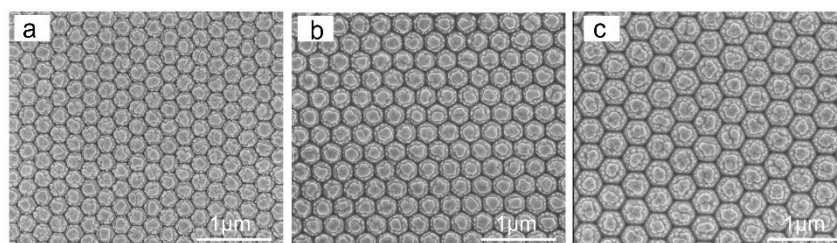

Figure S2. SEM images of PS templates with SnO<sub>2</sub> precursor infiltrated in the voids. There are little particles formed on the surface of PS spheres. (a) 251 nm, (b) 305nm, (c) 368nm

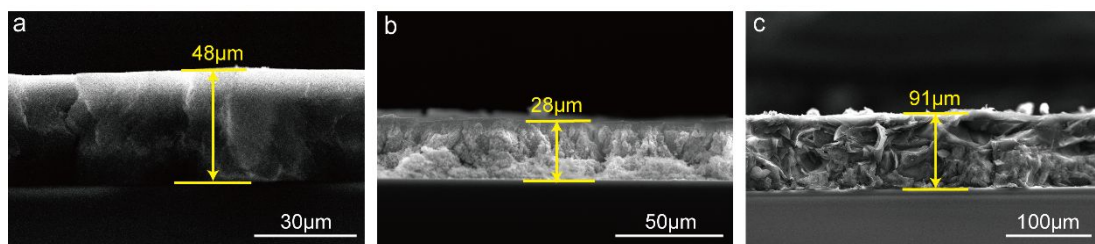

Figure S3 SEM images of cross-section (a) PS template (b)  $\text{SnO}_2$  inverse opal (c) TRPC

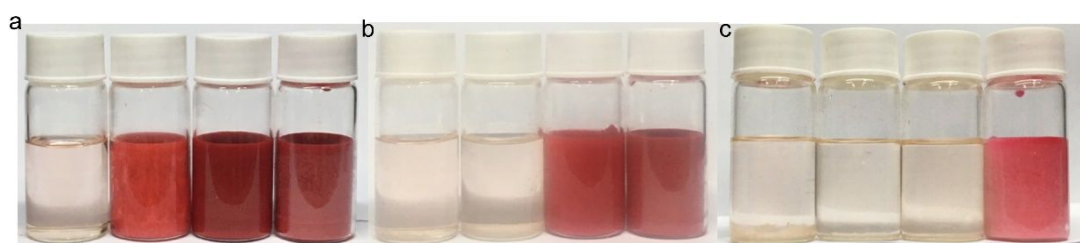

Figure S4. Optical photograph of the TC-PCSs obtained at different temperature, (a) 30 °C, (b) 42 °C (c) 55 °C. The four samples corresponding to different phase change materials, are lauryl alcohol, tetradecanol, hexadecanol, octadecanol respectively.
